# Supplementary material for: Determinants of Deadwood-Inhabiting Fungal Communities in Temperate Forests: Molecular Evidence From a Large Scale Deadwood Decomposition Experiment
Source: Front Microbiol. 2018 Sep 20;9:2120. doi: 10.3389/fmicb.2018.02120 (PMC6158579; doi:10.3389/fmicb.2018.02120)
Supplement: Supplementary file 2 [file Table_2.XLSX]

## Sheet: Sheet2
Table S4. wood-inhabiting fungal (WIF) OTUs that exhibit potential preferences (402 OTUs) for particular tree species and tree species combinations according to the indicator species analysis.
Tree species: Betula pendula	Group	1	Significant level	Number of associated OTUs			Total number of WIF OTUs	1254
Fungal OTU	stat	p.value		26			Selected number of WIF OTUs	402
BasidiomycotaOtu_0002	0.716	0.001	***				Number of WIF OTUs associated to 1 deadwood species	237
BasidiomycotaOtu_0946	0.441	0.001	***				Number of WIF OTUs associated to 2 deadwood species	99
BasidiomycotaOtu_0083	0.43	0.002	**				Number of WIF OTUs associated to 3 deadwood species	32
BasidiomycotaOtu_0408	0.43	0.001	***				Number of WIF OTUs associated to 4 deadwood species	25
BasidiomycotaOtu_1005	0.43	0.001	***				Number of WIF OTUs associated to 5 deadwood species	4
BasidiomycotaOtu_0771	0.426	0.001	***				Number of WIF OTUs associated to 6 deadwood species	3
BasidiomycotaOtu_0490	0.424	0.001	***				Number of WIF OTUs associated to 7 deadwood species	2
AscomycotaOtu_0893	0.416	0.001	***				Number of WIF OTUs associated to 8 deadwood species	0
BasidiomycotaOtu_0639	0.402	0.001	***				Number of WIF OTUs associated to 9 deadwood species	0
BasidiomycotaOtu_0776	0.402	0.001	***				Number of WIF OTUs associated to 10 deadwood species	0
BasidiomycotaOtu_0790	0.402	0.001	***
BasidiomycotaOtu_0785	0.402	0.002	**
AscomycotaOtu_1133	0.385	0.003	**
BasidiomycotaOtu_1152	0.385	0.001	***
AscomycotaOtu_0214	0.376	0.016	*
BasidiomycotaOtu_0936	0.374	0.002	**
AscomycotaOtu_0269	0.372	0.004	**
BasidiomycotaOtu_1127	0.354	0.002	**
AscomycotaOtu_1008	0.333	0.013	*
NAOtu_1223	0.333	0.008	**
AscomycotaOtu_1012	0.325	0.004	**
BasidiomycotaOtu_1044	0.309	0.023	*
BasidiomycotaOtu_1140	0.305	0.014	*
AscomycotaOtu_0684	0.301	0.027	*
AscomycotaOtu_1291	0.298	0.023	*
AscomycotaOtu_0942	0.272	0.024	*
Tree species: Fagus sylvatica	Group	2	Significant level	14
	stat	p.value
AscomycotaOtu_0027	0.72	0.001	***
AscomycotaOtu_0033	0.685	0.001	***
AscomycotaOtu_0199	0.609	0.001	***
AscomycotaOtu_0069	0.543	0.001	***
BasidiomycotaOtu_0017	0.392	0.001	***
BasidiomycotaOtu_0970	0.385	0.001	***
BasidiomycotaOtu_0057	0.385	0.002	**
AscomycotaOtu_0390	0.378	0.005	**
BasidiomycotaOtu_0632	0.373	0.001	***
BasidiomycotaOtu_0014	0.359	0.002	**
AscomycotaOtu_0645	0.347	0.002	**
AscomycotaOtu_0695	0.341	0.005	**
BasidiomycotaOtu_0595	0.333	0.012	*
BasidiomycotaOtu_1266	0.298	0.023	*
Tree species: Pseudotsuga menziesii	Group	3	Significant level	24
	stat	p.value
AscomycotaOtu_0154	0.667	0.001	***
AscomycotaOtu_0198	0.551	0.001	***
AscomycotaOtu_0304	0.536	0.001	***
AscomycotaOtu_0206	0.501	0.001	***
AscomycotaOtu_0308	0.485	0.001	***
AscomycotaOtu_0334	0.4	0.001	***
AscomycotaOtu_1061	0.398	0.001	***
BasidiomycotaOtu_0504	0.387	0.001	***
AscomycotaOtu_1129	0.385	0.001	***
BasidiomycotaOtu_0415	0.385	0.001	***
BasidiomycotaOtu_0670	0.372	0.001	***
AscomycotaOtu_0570	0.358	0.003	**
BasidiomycotaOtu_0545	0.355	0.002	**
BasidiomycotaOtu_0594	0.354	0.003	**
AscomycotaOtu_0280	0.346	0.006	**
AscomycotaOtu_0858	0.341	0.002	**
BasidiomycotaOtu_0312	0.333	0.003	**
BasidiomycotaOtu_1128	0.333	0.011	*
BasidiomycotaOtu_0757	0.318	0.008	**
AscomycotaOtu_0375	0.314	0.045	*
AscomycotaOtu_0543	0.31	0.013	*
AscomycotaOtu_0901	0.294	0.017	*
AscomycotaOtu_1009	0.282	0.021	*
BasidiomycotaOtu_0958	0.262	0.031	*
Tree species: Quercus spp.	Group	4	Significant level	33
	stat	p.value
BasidiomycotaOtu_0018	0.769	0.001	***
AscomycotaOtu_0074	0.748	0.001	***
AscomycotaOtu_0221	0.711	0.001	***
AscomycotaOtu_0124	0.631	0.001	***
AscomycotaOtu_0140	0.607	0.001	***
AscomycotaOtu_0136	0.546	0.001	***
AscomycotaOtu_0153	0.529	0.001	***
AscomycotaOtu_0236	0.509	0.001	***
AscomycotaOtu_0498	0.509	0.001	***
BasidiomycotaOtu_0144	0.509	0.001	***
AscomycotaOtu_0352	0.497	0.001	***
AscomycotaOtu_0218	0.472	0.001	***
AscomycotaOtu_0737	0.471	0.001	***
AscomycotaOtu_0442	0.462	0.001	***
AscomycotaOtu_0265	0.449	0.001	***
AscomycotaOtu_0298	0.43	0.002	**
BasidiomycotaOtu_1242	0.43	0.001	***
AscomycotaOtu_0090	0.426	0.002	**
AscomycotaOtu_0277	0.418	0.002	**
NAOtu_0565	0.409	0.001	***
BasidiomycotaOtu_0434	0.385	0.002	**
BasidiomycotaOtu_0609	0.385	0.003	**
BasidiomycotaOtu_0704	0.385	0.002	**
AscomycotaOtu_0544	0.356	0.001	***
AscomycotaOtu_0369	0.333	0.009	**
AscomycotaOtu_1091	0.333	0.012	*
BasidiomycotaOtu_0830	0.333	0.005	**
BasidiomycotaOtu_0889	0.333	0.011	*
AscomycotaOtu_0141	0.333	0.007	**
AscomycotaOtu_0327	0.329	0.045	*
AscomycotaOtu_0465	0.322	0.008	**
BasidiomycotaOtu_0031	0.279	0.027	*
AscomycotaOtu_0608	0.261	0.04	*
Tree species: Fraxinus excelsior	Group	5	Significant level	23
	stat	p.value
AscomycotaOtu_0197	0.903	0.001	***
BasidiomycotaOtu_0081	0.745	0.001	***
AscomycotaOtu_0087	0.742	0.001	***
AscomycotaOtu_0013	0.693	0.001	***
AscomycotaOtu_0183	0.651	0.001	***
AscomycotaOtu_0219	0.513	0.001	***
AscomycotaOtu_0200	0.509	0.001	***
BasidiomycotaOtu_0038	0.509	0.001	***
BasidiomycotaOtu_0338	0.502	0.001	***
AscomycotaOtu_0301	0.483	0.001	***
BasidiomycotaOtu_0829	0.447	0.001	***
BasidiomycotaOtu_0242	0.43	0.001	***
BasidiomycotaOtu_0148	0.388	0.003	**
AscomycotaOtu_0589	0.385	0.002	**
BasidiomycotaOtu_0781	0.367	0.002	**
AscomycotaOtu_0467	0.365	0.004	**
BasidiomycotaOtu_0823	0.362	0.001	***
AscomycotaOtu_1038	0.333	0.009	**
AscomycotaOtu_1269	0.333	0.008	**
BasidiomycotaOtu_0185	0.323	0.018	*
BasidiomycotaOtu_0660	0.312	0.015	*
BasidiomycotaOtu_1115	0.305	0.008	**
AscomycotaOtu_0571	0.295	0.018	*
Tree species: Picea abies	Group	6	Significant level	13
	stat	p.value
AscomycotaOtu_0370	0.504	0.001	***
ZygomycotaOtu_0590	0.421	0.001	***
BasidiomycotaOtu_1156	0.385	0.001	***
BasidiomycotaOtu_0361	0.362	0.002	**
BasidiomycotaOtu_0996	0.333	0.01	**
AscomycotaOtu_0231	0.327	0.016	*
AscomycotaOtu_0385	0.319	0.03	*
BasidiomycotaOtu_0158	0.317	0.024	*
AscomycotaOtu_0268	0.311	0.034	*
AscomycotaOtu_0666	0.311	0.01	**
BasidiomycotaOtu_1256	0.298	0.015	*
AscomycotaOtu_0836	0.298	0.01	**
BasidiomycotaOtu_1015	0.282	0.041	*
Tree species: Carpinus betulus	Group	7	Significant level	11
	stat	p.value
AscomycotaOtu_0029	0.77	0.001	***
AscomycotaOtu_0533	0.453	0.001	***
AscomycotaOtu_1106	0.385	0.003	**
BasidiomycotaOtu_0126	0.364	0.004	**
AscomycotaOtu_0257	0.333	0.007	**
BasidiomycotaOtu_0182	0.33	0.02	*
AscomycotaOtu_0650	0.313	0.018	*
AscomycotaOtu_1297	0.31	0.008	**
BasidiomycotaOtu_1141	0.305	0.01	**
BasidiomycotaOtu_1304	0.299	0.004	**
BasidiomycotaOtu_1295	0.261	0.021	*
Tree species: Pinus sylvestris	Group	8	Significant level	21
	stat	p.value
BasidiomycotaOtu_0215	0.687	0.001	***
BasidiomycotaOtu_0091	0.621	0.001	***
BasidiomycotaOtu_0024	0.584	0.001	***
AscomycotaOtu_0288	0.5	0.001	***
BasidiomycotaOtu_0255	0.498	0.001	***
AscomycotaOtu_0347	0.451	0.001	***
AscomycotaOtu_0165	0.413	0.015	*
BasidiomycotaOtu_0371	0.41	0.001	***
NAOtu_0344	0.41	0.001	***
AscomycotaOtu_0299	0.398	0.002	**
BasidiomycotaOtu_0040	0.385	0.001	***
AscomycotaOtu_0472	0.378	0.002	**
BasidiomycotaOtu_0046	0.373	0.022	*
BasidiomycotaOtu_0505	0.346	0.006	**
AscomycotaOtu_0855	0.333	0.008	**
BasidiomycotaOtu_0424	0.333	0.011	*
BasidiomycotaOtu_0845	0.333	0.01	**
AscomycotaOtu_0108	0.333	0.024	*
AscomycotaOtu_0297	0.313	0.019	*
AscomycotaOtu_0248	0.304	0.02	*
AscomycotaOtu_0636	0.288	0.023	*
Tree species: Larix decidua	Group	9	Significant level	11
	stat	p.value
BasidiomycotaOtu_0105	0.596	0.001	***
AscomycotaOtu_0253	0.578	0.001	***
AscomycotaOtu_0374	0.509	0.001	***
AscomycotaOtu_0738	0.43	0.001	***
AscomycotaOtu_0398	0.403	0.001	***
BasidiomycotaOtu_0163	0.356	0.005	**
AscomycotaOtu_0227	0.345	0.005	**
BasidiomycotaOtu_0035	0.344	0.002	**
AscomycotaOtu_0293	0.322	0.041	*
BasidiomycotaOtu_1075	0.309	0.008	**
BasidiomycotaOtu_0357	0.306	0.022	*
Tree species: Tilia spp.	Group	10	Significant level	18
	stat	p.value
AscomycotaOtu_0192	0.79	0.001	***
AscomycotaOtu_0098	0.772	0.001	***
AscomycotaOtu_0039	0.679	0.001	***
AscomycotaOtu_0402	0.644	0.001	***
AscomycotaOtu_0235	0.471	0.001	***
AscomycotaOtu_1094	0.471	0.001	***
NAOtu_0311	0.466	0.001	***
AscomycotaOtu_0920	0.43	0.001	***
AscomycotaOtu_0222	0.385	0.001	***
BasidiomycotaOtu_0208	0.385	0.001	***
BasidiomycotaOtu_0066	0.37	0.002	**
BasidiomycotaOtu_0238	0.353	0.003	**
AscomycotaOtu_0913	0.333	0.012	*
BasidiomycotaOtu_0044	0.333	0.014	*
AscomycotaOtu_0925	0.332	0.005	**
BasidiomycotaOtu_1092	0.309	0.007	**
AscomycotaOtu_0346	0.307	0.021	*
BasidiomycotaOtu_1139	0.304	0.026	*
Tree species: Populus spp.	Group	11	Significant level	43
	stat	p.value
BasidiomycotaOtu_0045	0.882	0.001	***
AscomycotaOtu_0104	0.818	0.001	***
AscomycotaOtu_0150	0.788	0.001	***
AscomycotaOtu_0099	0.667	0.001	***
AscomycotaOtu_0064	0.666	0.001	***
AscomycotaOtu_0272	0.54	0.001	***
AscomycotaOtu_0229	0.527	0.001	***
BasidiomycotaOtu_0007	0.481	0.004	**
AscomycotaOtu_0769	0.471	0.001	***
BasidiomycotaOtu_0844	0.471	0.001	***
AscomycotaOtu_0171	0.471	0.001	***
AscomycotaOtu_0211	0.467	0.001	***
AscomycotaOtu_0195	0.464	0.001	***
BasidiomycotaOtu_0492	0.43	0.001	***
AscomycotaOtu_0735	0.429	0.001	***
BasidiomycotaOtu_0097	0.426	0.027	*
AscomycotaOtu_0761	0.411	0.001	***
AscomycotaOtu_0209	0.385	0.001	***
AscomycotaOtu_0688	0.385	0.002	**
BasidiomycotaOtu_0947	0.385	0.001	***
BasidiomycotaOtu_0036	0.385	0.002	**
BasidiomycotaOtu_0345	0.379	0.006	**
AscomycotaOtu_0333	0.374	0.001	***
BasidiomycotaOtu_0252	0.371	0.001	***
BasidiomycotaOtu_0786	0.367	0.003	**
BasidiomycotaOtu_0944	0.36	0.004	**
ChytridiomycotaOtu_0495	0.357	0.002	**
BasidiomycotaOtu_1053	0.356	0.001	***
AscomycotaOtu_0527	0.352	0.003	**
AscomycotaOtu_0355	0.344	0.006	**
AscomycotaOtu_0330	0.344	0.012	*
AscomycotaOtu_0537	0.333	0.012	*
AscomycotaOtu_0612	0.333	0.009	**
BasidiomycotaOtu_0103	0.333	0.012	*
BasidiomycotaOtu_0403	0.333	0.012	*
BasidiomycotaOtu_0427	0.333	0.005	**
BasidiomycotaOtu_1299	0.333	0.011	*
AscomycotaOtu_0294	0.325	0.022	*
AscomycotaOtu_0534	0.319	0.022	*
AscomycotaOtu_0577	0.316	0.01	**
AscomycotaOtu_0824	0.315	0.015	*
BasidiomycotaOtu_0630	0.302	0.024	*
BasidiomycotaOtu_0407	0.298	0.037	*
	Group	1+2	Significant level	3
	stat	p.value
ZygomycotaOtu_0775	0.385	0.001	***
BasidiomycotaOtu_0945	0.312	0.005	**
AscomycotaOtu_0816	0.304	0.013	*
	Group	1+4	Significant level	2
	stat	p.value
AscomycotaOtu_0213	0.422	0.001	***
BasidiomycotaOtu_1118	0.272	0.044	*
	Group	1+7	Significant level	2
	stat	p.value
AscomycotaOtu_0020	0.799	0.001	***
BasidiomycotaOtu_0701	0.313	0.012	*
	Group	1+8	Significant level	1
	stat	p.value
BasidiomycotaOtu_0071	0.332	0.014	*
	Group	1+10	Significant level	1
	stat	p.value
AscomycotaOtu_0440	0.336	0.017	*
	Group	2+4	Significant level	1
	stat	p.value
AscomycotaOtu_0175	0.486	0.001	***
	Group	2+5	Significant level	1
	stat	p.value
AscomycotaOtu_0172	0.419	0.002	**
	Group	2+7	Significant level	5
	stat	p.value
AscomycotaOtu_0157	0.349	0.01	**
BasidiomycotaOtu_0616	0.323	0.008	**
AscomycotaOtu_0419	0.319	0.008	**
AscomycotaOtu_1251	0.304	0.009	**
AscomycotaOtu_0646	0.301	0.029	*
	Group	2+10	Significant level	1
	stat	p.value
BasidiomycotaOtu_0239	0.542	0.001	***
	Group	3+4	Significant level	4
	stat	p.value
AscomycotaOtu_0094	0.652	0.001	***
AscomycotaOtu_0130	0.553	0.001	***
BasidiomycotaOtu_0188	0.304	0.026	*
BasidiomycotaOtu_0438	0.294	0.034	*
	Group	3+5	Significant level	2
	stat	p.value
AscomycotaOtu_0306	0.506	0.001	***
AscomycotaOtu_0496	0.36	0.003	**
	Group	3+6	Significant level	11
	stat	p.value
BasidiomycotaOtu_0006	0.636	0.001	***
AscomycotaOtu_0147	0.511	0.001	***
AscomycotaOtu_0177	0.49	0.001	***
BasidiomycotaOtu_0077	0.445	0.001	***
AscomycotaOtu_0365	0.435	0.001	***
AscomycotaOtu_0302	0.415	0.001	***
BasidiomycotaOtu_0249	0.398	0.002	**
AscomycotaOtu_0282	0.334	0.011	*
NAOtu_0723	0.304	0.009	**
BasidiomycotaOtu_0813	0.288	0.02	*
BasidiomycotaOtu_0433	0.278	0.04	*
	Group	3+8	Significant level	5
	stat	p.value
AscomycotaOtu_0102	0.527	0.001	***
BasidiomycotaOtu_0114	0.423	0.024	*
AscomycotaOtu_0742	0.304	0.015	*
AscomycotaOtu_0997	0.282	0.015	*
AscomycotaOtu_0469	0.272	0.049	*
	Group	3+9	Significant level	4
	stat	p.value
BasidiomycotaOtu_0079	0.75	0.001	***
AscomycotaOtu_0072	0.603	0.001	***
AscomycotaOtu_0225	0.585	0.001	***
AscomycotaOtu_0745	0.278	0.041	*
	Group	3+11	Significant level	1
	stat	p.value
BasidiomycotaOtu_0526	0.341	0.005	**
	Group	4+7	Significant level	5
	stat	p.value
AscomycotaOtu_0026	0.773	0.001	***
BasidiomycotaOtu_0011	0.647	0.001	***
BasidiomycotaOtu_0782	0.318	0.013	*
AscomycotaOtu_0656	0.304	0.022	*
BasidiomycotaOtu_0607	0.287	0.039	*
	Group	4+8	Significant level	1
	stat	p.value
BasidiomycotaOtu_0121	0.428	0.001	***
	Group	4+9	Significant level	1
	stat	p.value
BasidiomycotaOtu_0128	0.359	0.005	**
	Group	4+10	Significant level	2
	stat	p.value
BasidiomycotaOtu_0487	0.371	0.002	**
AscomycotaOtu_1084	0.272	0.049	*
	Group	5+6	Significant level	1
	stat	p.value
BasidiomycotaOtu_0049	0.678	0.001	***
	Group	5+10	Significant level	7
	stat	p.value
BasidiomycotaOtu_0041	0.733	0.001	***
AscomycotaOtu_0251	0.464	0.001	***
AscomycotaOtu_0230	0.332	0.015	*
BasidiomycotaOtu_0900	0.293	0.016	*
AscomycotaOtu_0939	0.285	0.014	*
AscomycotaOtu_0606	0.272	0.05	*
AscomycotaOtu_0916	0.272	0.048	*
	Group	5+11	Significant level	3
	stat	p.value
BasidiomycotaOtu_0336	0.394	0.003	**
AscomycotaOtu_0162	0.34	0.023	*
AscomycotaOtu_0664	0.304	0.01	**
	Group	6+8	Significant level	10
	stat	p.value
AscomycotaOtu_0228	0.467	0.002	**
AscomycotaOtu_0285	0.382	0.002	**
AscomycotaOtu_0693	0.36	0.002	**
AscomycotaOtu_0373	0.36	0.004	**
AscomycotaOtu_0751	0.319	0.004	**
AscomycotaOtu_0410	0.313	0.042	*
BasidiomycotaOtu_0320	0.304	0.01	**
BasidiomycotaOtu_0878	0.304	0.009	**
BasidiomycotaOtu_1080	0.304	0.013	*
AscomycotaOtu_0500	0.272	0.049	*
	Group	6+9	Significant level	13
	stat	p.value
BasidiomycotaOtu_0019	0.568	0.001	***
BasidiomycotaOtu_0005	0.525	0.001	***
BasidiomycotaOtu_0349	0.456	0.001	***
AscomycotaOtu_0578	0.351	0.003	**
AscomycotaOtu_0716	0.331	0.002	**
BasidiomycotaOtu_0267	0.33	0.009	**
BasidiomycotaOtu_0088	0.321	0.019	*
AscomycotaOtu_0846	0.316	0.01	**
AscomycotaOtu_1289	0.304	0.007	**
BasidiomycotaOtu_0835	0.304	0.004	**
BasidiomycotaOtu_1157	0.304	0.009	**
BasidiomycotaOtu_1253	0.304	0.011	*
AscomycotaOtu_0451	0.272	0.034	*
	Group	6+11	Significant level	1
	stat	p.value
AscomycotaOtu_0475	0.343	0.008	**
	Group	7+8	Significant level	1
	stat	p.value
BasidiomycotaOtu_0629	0.272	0.046	*
	Group	7+10	Significant level	1
	stat	p.value
AscomycotaOtu_0250	0.304	0.034	*
	Group	7+11	Significant level	2
	stat	p.value
BasidiomycotaOtu_0832	0.342	0.003	**
AscomycotaOtu_1036	0.283	0.025	*
	Group	8+9	Significant level	3
	stat	p.value
AscomycotaOtu_0392	0.381	0.002	**
AscomycotaOtu_0584	0.322	0.009	**
BasidiomycotaOtu_0575	0.316	0.021	*
	Group	9+10	Significant level	1
	stat	p.value
BasidiomycotaOtu_0075	0.333	0.006	**
	Group	10+11	Significant level	3
	stat	p.value
AscomycotaOtu_0060	0.555	0.001	***
AscomycotaOtu_0322	0.328	0.015	*
AscomycotaOtu_0978	0.312	0.008	**
	Group	1+2+7	Significant level	2
	stat	p.value
NAOtu_0258	0.352	0.015	*
AscomycotaOtu_0540	0.351	0.002	**
	Group	1+3+7	Significant level	1
	stat	p.value
AscomycotaOtu_0273	0.346	0.02	*
	Group	1+3+9	Significant level	1
	stat	p.value
BasidiomycotaOtu_0012	0.767	0.001	***
	Group	1+5+11	Significant level	1
	stat	p.value
AscomycotaOtu_0450	0.351	0.002	**
	Group	1+7+10	Significant level	1
	stat	p.value
AscomycotaOtu_0042	0.644	0.008	**
	Group	3+4+9	Significant level	1
	stat	p.value
AscomycotaOtu_0115	0.364	0.03	*
	Group	3+6+8	Significant level	2
	stat	p.value
BasidiomycotaOtu_0004	0.601	0.001	***
BasidiomycotaOtu_0010	0.513	0.001	***
	Group	3+6+9	Significant level	3
	stat	p.value
BasidiomycotaOtu_0021	0.456	0.002	**
BasidiomycotaOtu_0063	0.36	0.023	*
AscomycotaOtu_0439	0.318	0.013	*
	Group	3+8+9	Significant level	5
	stat	p.value
AscomycotaOtu_0116	0.441	0.003	**
AscomycotaOtu_0325	0.369	0.002	**
AscomycotaOtu_0511	0.295	0.041	*
AscomycotaOtu_0416	0.294	0.04	*
BasidiomycotaOtu_0887	0.294	0.014	*
	Group	3+8+11	Significant level	1
	stat	p.value
AscomycotaOtu_0679	0.322	0.005	**
	Group	3+9+11	Significant level	1
	stat	p.value
AscomycotaOtu_0305	0.454	0.001	***
	Group	4+10+11	Significant level	1
	stat	p.value
AscomycotaOtu_0279	0.372	0.044	*
	Group	5+7+10	Significant level	1
	stat	p.value
AscomycotaOtu_0025	0.613	0.001	***
	Group	5+10+11	Significant level	3
	stat	p.value
AscomycotaOtu_0015	0.762	0.001	***
AscomycotaOtu_0050	0.597	0.001	***
AscomycotaOtu_0169	0.499	0.002	**
	Group	6+8+9	Significant level	5
	stat	p.value
AscomycotaOtu_0059	0.467	0.011	*
AscomycotaOtu_0237	0.398	0.005	**
AscomycotaOtu_0446	0.319	0.012	*
BasidiomycotaOtu_0315	0.309	0.035	*
AscomycotaOtu_0226	0.294	0.044	*
	Group	7+10+11	Significant level	3
	stat	p.value
BasidiomycotaOtu_0270	0.401	0.002	**
BasidiomycotaOtu_0043	0.387	0.032	*
AscomycotaOtu_0366	0.348	0.003	**
	Group	1+3+4+8	Significant level	1
	stat	p.value
AscomycotaOtu_0030	0.731	0.001	***
	Group	1+3+8+9	Significant level	1
	stat	p.value
BasidiomycotaOtu_0176	0.501	0.001	***
	Group	1+4+7+8	Significant level	1
	stat	p.value
AscomycotaOtu_0186	0.424	0.005	**
	Group	1+4+8+9	Significant level	2
	stat	p.value
NAOtu_0223	0.391	0.022	*
BasidiomycotaOtu_0028	0.347	0.016	*
	Group	1+5+10+11	Significant level	3
	stat	p.value
AscomycotaOtu_0008	0.772	0.001	***
AscomycotaOtu_0113	0.69	0.001	***
AscomycotaOtu_0131	0.662	0.001	***
	Group	1+6+8+9	Significant level	2
	stat	p.value
BasidiomycotaOtu_0023	0.743	0.001	***
BasidiomycotaOtu_0168	0.403	0.006	**
	Group	2+5+7+10	Significant level	1
	stat	p.value
AscomycotaOtu_0009	0.504	0.001	***
	Group	2+6+7+8	Significant level	1
	stat	p.value
AscomycotaOtu_0196	0.371	0.045	*
	Group	2+6+8+9	Significant level	1
	stat	p.value
AscomycotaOtu_0625	0.333	0.006	**
	Group	3+4+5+11	Significant level	1
	stat	p.value
BasidiomycotaOtu_0266	0.404	0.038	*
	Group	3+4+8+9	Significant level	1
	stat	p.value
AscomycotaOtu_0359	0.375	0.013	*
	Group	3+6+8+9	Significant level	8
	stat	p.value
AscomycotaOtu_0022	0.839	0.001	***
BasidiomycotaOtu_0259	0.524	0.001	***
AscomycotaOtu_0190	0.515	0.001	***
AscomycotaOtu_0271	0.484	0.001	***
BasidiomycotaOtu_0048	0.481	0.017	*
AscomycotaOtu_0194	0.473	0.001	***
AscomycotaOtu_0406	0.352	0.008	**
AscomycotaOtu_0530	0.304	0.023	*
	Group	4+6+8+9	Significant level	1
	stat	p.value
AscomycotaOtu_0393	0.332	0.032	*
	Group	5+6+8+9	Significant level	1
	stat	p.value
AscomycotaOtu_0443	0.304	0.025	*
	Group	1+2+7+10+11	Significant level	1
	stat	p.value
BasidiomycotaOtu_0003	0.64	0.001	***
	Group	3+4+6+8+9	Significant level	1
	stat	p.value
BasidiomycotaOtu_0262	0.419	0.002	**
	Group	3+5+6+8+9	Significant level	1
	stat	p.value
AscomycotaOtu_0052	0.568	0.001	***
	Group	3+6+8+9+11	Significant level	1
	stat	p.value
AscomycotaOtu_0278	0.426	0.006	**
	Group	1+3+6+8+9+11	Significant level	1
	stat	p.value
AscomycotaOtu_0170	0.497	0.002	**
	Group	3+4+5+6+9+11	Significant level	1
	stat	p.value
AscomycotaOtu_0205	0.472	0.016	*
	Group	3+4+6+7+8+9	Significant level	1
	stat	p.value
AscomycotaOtu_0058	0.504	0.002	**
	Group	1+3+4+6+7+8+9	Significant level	1
	stat	p.value
AscomycotaOtu_0146	0.466	0.015	*
	Group	2+4+6+7+8+9+10	Significant level	1
	stat	p.value
AscomycotaOtu_0145	0.584	0.001	***
